# Supplementary material
Source: PubMed Central journal article supplement (PMC2613734)
Supplement: supp_149_1_132__1.pdf [file supp_149_1_132__1.pdf]

**Table I.** Data types available at grass database websites

The names of grass databases, the types of data that may be found at each database and the URLs of the database websites are listed.

| Database                           | Data Types  |                  |                                |                       |                    |                                     |                 |                 |                 |                               |            |         |                   |                              |           |            |                        |                                        | URL                                                                                                               |
|------------------------------------|-------------|------------------|--------------------------------|-----------------------|--------------------|-------------------------------------|-----------------|-----------------|-----------------|-------------------------------|------------|---------|-------------------|------------------------------|-----------|------------|------------------------|----------------------------------------|-------------------------------------------------------------------------------------------------------------------|
|                                    | Gene Models | Gene Predictions | Repetitive Sequence Annotation | Transcript Alignments | Protein Alignments | Cross-species Transcript Alignments | Protein Domains | Expression Data | Functional Data | Gene Ontology Classifications | Small RNAs | Markers | Genetic Maps/QTLs | Transposon/T-DNA/EMS Mutants | Germplasm | Phenotypes | Derived mRNA Sequences | Gene/Protein Interactions/Associations |                                                                                                                   |
| <b>Annotation</b>                  |             |                  |                                |                       |                    |                                     |                 |                 |                 |                               |            |         |                   |                              |           |            |                        |                                        |                                                                                                                   |
| Gramene                            | X           | X                | X                              | X                     | X                  | X                                   | X               | X               | X               | X                             | X          | X       | X                 | X                            |           |            |                        |                                        | <a href="http://www.gramene.org">http://www.gramene.org</a>                                                       |
| JGI Sorghum                        | X           | X                | X                              | X                     | X                  | X                                   | X               |                 | X               | X                             |            |         |                   |                              |           |            |                        |                                        | <a href="http://genome.jgi-psf.org/Sorbi1/Sorbi1.home.html">http://genome.jgi-psf.org/Sorbi1/Sorbi1.home.html</a> |
| MaizeSequence                      | X           | X                | X                              | X                     | X                  | X                                   | X               | X               |                 |                               | X          | X       |                   | X                            |           |            |                        |                                        | <a href="http://www.maizesequence.org">http://www.maizesequence.org</a>                                           |
| MSU Rice Genome Annotation Project | X           | X                | X                              | X                     | X                  | X                                   | X               | X               | X               | X                             | X          | X       |                   | X                            |           |            |                        |                                        | <a href="http://rice.plantbiology.msu.edu">http://rice.plantbiology.msu.edu</a>                                   |
| Phytozome                          | X           |                  | X                              | X                     | X                  | X                                   |                 |                 | X               |                               |            |         |                   |                              |           |            |                        |                                        | <a href="http://www.phytozome.net/sorghum">http://www.phytozome.net/sorghum</a>                                   |
| Rice Annotation                    | X           | X                | X                              | X                     |                    |                                     | X               | X               | X               | X                             | X          | X       |                   | X                            |           |            |                        |                                        | <a href="http://rapdb.dna.affrc.go.jp">http://rapdb.dna.affrc.go.jp</a>                                           |

|                                     |   |   |   |   |   |   |   |   |   |   |   |   |   |   |   |   |   |  |                                                                                                                                         |
|-------------------------------------|---|---|---|---|---|---|---|---|---|---|---|---|---|---|---|---|---|--|-----------------------------------------------------------------------------------------------------------------------------------------|
| Project                             |   |   |   |   |   |   |   |   |   |   |   |   |   |   |   |   |   |  |                                                                                                                                         |
| RiceGAAS                            |   | X | X | X | X | X | X |   | X | X | X |   |   |   |   |   |   |  | <a href="http://ricegaas.dna.affrc.go.jp">http://ricegaas.dna.affrc.go.jp</a>                                                           |
| Rise                                | X | X | X | X |   |   |   | X |   |   |   | X |   |   |   |   |   |  | <a href="http://rice.genomics.org.cn/rice/index2.jsp">http://rice.genomics.org.cn/rice/index2.jsp</a>                                   |
| PlantGDB                            | X |   |   | X | X | X |   |   | X |   |   |   |   |   |   |   | X |  | <a href="http://www.plantgdb.org">http://www.plantgdb.org</a>                                                                           |
| <b>Genetic/Germplasm</b>            |   |   |   |   |   |   |   |   |   |   |   |   |   |   |   |   |   |  |                                                                                                                                         |
| Barley SNP Database                 |   |   |   |   |   | X |   |   | X |   |   | X | X |   |   |   |   |  | <a href="http://bioinf.scri.ac.uk/barley_sn_pdb">http://bioinf.scri.ac.uk/barley_sn_pdb</a>                                             |
| Barley Mutant Database              |   |   |   |   |   |   |   |   |   |   |   |   |   | X |   | X |   |  | <a href="http://germinate.scri.ac.uk/cgi-bin/mutantsdatabase/index.pl">http://germinate.scri.ac.uk/cgi-bin/mutantsdatabase/index.pl</a> |
| GrainGenes                          |   |   |   |   |   |   |   | X |   |   |   | X | X |   | X | X |   |  | <a href="http://wheat.pw.usda.gov/GG2/index.shtml">http://wheat.pw.usda.gov/GG2/index.shtml</a>                                         |
| Komugi                              |   |   |   |   |   |   |   | X |   |   |   | X | X |   | X | X |   |  | <a href="http://www.shigen.nig.ac.jp/wheat/komugi/top/top.jsp">http://www.shigen.nig.ac.jp/wheat/komugi/top/top.jsp</a>                 |
| Maize Assembled Genomic Islands     |   | X |   | X |   |   |   |   |   |   |   | X | X |   |   |   |   |  | <a href="http://magi.plantgenomics.iastate.edu">http://magi.plantgenomics.iastate.edu</a>                                               |
| Maize Targeted Mutagenesis Database |   |   |   |   |   |   |   |   |   |   |   |   |   | X | X | X |   |  | <a href="http://mtm.cshl.org">http://mtm.cshl.org</a>                                                                                   |
| MaizeGDB                            |   |   |   |   |   |   |   | X |   |   |   | X | X | X | X | X |   |  | <a href="http://www.maizegdb.org">http://www.maizegdb.org</a>                                                                           |
| NCBI MapViewer                      |   |   |   |   |   |   |   |   |   |   |   | X | X |   |   |   |   |  | <a href="http://www.ncbi.nlm.nih.gov/projects/mapview">http://www.ncbi.nlm.nih.gov/projects/mapview</a>                                 |
| OryGenesDB                          | X |   |   | X |   | X | X |   | X |   |   | X | X | X | X |   |   |  | <a href="http://orygenesdb.cirad.fr/">http://orygenesdb.cirad.fr/</a>                                                                   |

|                                                                |   |  |  |   |  |   |   |   |   |   |   |   |   |   |   |   |   |   |  |                                                                                                                                                                                            |
|----------------------------------------------------------------|---|--|--|---|--|---|---|---|---|---|---|---|---|---|---|---|---|---|--|--------------------------------------------------------------------------------------------------------------------------------------------------------------------------------------------|
| Oryza Tag Line                                                 |   |  |  |   |  |   |   | X |   |   |   |   |   |   | X | X | X |   |  | <a href="http://urgi.versailles.inra.fr/OryzaTagLine">http://urgi.versailles.inra.fr/OryzaTagLine</a>                                                                                      |
| Oryzabase                                                      | X |  |  |   |  |   |   |   |   | X |   | X | X | X | X | X | X |   |  | <a href="http://www.shigen.nig.ac.jp/rice/oryzabase">http://www.shigen.nig.ac.jp/rice/oryzabase</a>                                                                                        |
| OryzaSNP                                                       | X |  |  |   |  |   |   |   | X |   |   | X |   |   |   |   |   |   |  | <a href="http://irfgc.irri.org/index.php?option=com_content&amp;task=view&amp;id=14&amp;Itemid=106">irfgc.irri.org/index.php?option=com_content&amp;task=view&amp;id=14&amp;Itemid=106</a> |
| OryzaSNP @ MSU                                                 | X |  |  |   |  |   |   |   | X |   |   | X |   |   |   |   |   |   |  | <a href="http://oryzasnp.plantbiology.msu.edu">http://oryzasnp.plantbiology.msu.edu</a>                                                                                                    |
| Panzea                                                         |   |  |  |   |  |   |   |   |   |   |   | X | X |   |   | X | X |   |  | <a href="http://www.panzea.org">http://www.panzea.org</a>                                                                                                                                  |
| RiceGE                                                         | X |  |  | X |  | X | X | X | X |   | X | X |   |   | X |   |   |   |  | <a href="http://signal.salk.edu/cgi-bin/RiceGE">http://signal.salk.edu/cgi-bin/RiceGE</a>                                                                                                  |
| Sorghum Diversity Project                                      |   |  |  |   |  |   |   |   |   |   |   | X |   |   |   | X |   |   |  | <a href="http://sorghumdiversity.org/sorghum/index.html">http://sorghumdiversity.org/sorghum/index.html</a>                                                                                |
| Wild rice DB                                                   |   |  |  |   |  |   |   |   |   |   |   |   |   |   |   | X | X |   |  | <a href="http://www.pgcdna.co.jp/cgi-bin/wrdb/content.cgi">http://www.pgcdna.co.jp/cgi-bin/wrdb/content.cgi</a>                                                                            |
| <b>Transcript Sequences</b>                                    |   |  |  |   |  |   |   |   |   |   |   |   |   |   |   |   |   |   |  |                                                                                                                                                                                            |
| Gene Index Project                                             |   |  |  |   |  |   |   | X | X | X |   |   |   |   |   |   |   | X |  | <a href="http://compbio.dfci.harvard.edu/tgi/plant.html">http://compbio.dfci.harvard.edu/tgi/plant.html</a>                                                                                |
| Knowledge-based Oryza Molecular biological Encyclopedia (KOME) |   |  |  |   |  |   | X |   | X | X |   |   |   |   |   |   |   | X |  | <a href="http://cdna01.dna.affrc.go.jp/cDNA">http://cdna01.dna.affrc.go.jp/cDNA</a>                                                                                                        |
| NCBI Unigene                                                   |   |  |  |   |  |   |   |   | X |   |   |   |   |   |   |   |   | X |  | <a href="http://www.ncbi.nlm.nih.gov/sites/entrez?db=unigene">http://www.ncbi.nlm.nih.gov/sites/entrez?db=unigene</a>                                                                      |



|                                              |   |  |  |   |   |   |  |   |  |   |  |  |  |  |  |  |  |   |                                                                                                                                         |
|----------------------------------------------|---|--|--|---|---|---|--|---|--|---|--|--|--|--|--|--|--|---|-----------------------------------------------------------------------------------------------------------------------------------------|
| NSF Rice<br>Oligonucleotide<br>Array Project | X |  |  |   |   |   |  | X |  |   |  |  |  |  |  |  |  | X | <a href="http://www.ricearray.org">http://www.ricearray.org</a>                                                                         |
| PlexDB                                       |   |  |  | X | X | X |  | X |  | X |  |  |  |  |  |  |  |   | <a href="http://www.plexdb.org">http://www.plexdb.org</a>                                                                               |
| Yale Rice<br>Expression Project              | X |  |  |   |   |   |  | X |  |   |  |  |  |  |  |  |  |   | <a href="http://bioinformatics.med.yale.edu/riceatlas/description.jsp">http://bioinformatics.med.yale.edu/riceatlas/description.jsp</a> |
